# Supplementary material
Source: PubMed Central journal article supplement (PMC2695090)
Supplement: 0902476106_0902476106SI.pdf [file 0902476106_0902476106SI.pdf]

# Supporting Information

Thomas et al. 10.1073/pnas.0902476106

## SI Text

**Additional Experimental Information.** Nitrocellulose (11.8–12.2% N) was obtained from Scientific Polymer Products (Catalog no. 711). All metallic salts were obtained from either Alfa Aesar or Sigma-Aldrich in the highest available purity. The emission spectra of rubidium and cesium salts with purity <99.5% showed contamination from lighter alkali metals. The surfactant Surfynol 440 was obtained from Air Products. All aqueous solutions were prepared with water purified and deionized by a Millipore system.

Fuses burned most reliably in a vertical orientation and held at the bottom (in our experiments, with a small alligator clip). Fuses thinner than  $\approx 100 \mu\text{m}$  and longer than  $\approx 10 \text{ cm}$  could not stay upright, and so were supported in several places with copper wire. Fuses thicker than  $\geq 100 \mu\text{m}$  and up to 20 cm long supported their own weight when lit.

Movies of burning infuses were acquired with an RGB CCD camera (Epix) at 1,000 frames per second equipped with a fisheye lens and a notch optical filter (FWHM  $\approx 10 \text{ nm}$ ) to exclude the background emission from sodium ( $\lambda = 589 \text{ nm}$ ).

A filter-based detection system was used to acquire signals from as far as 300 m from the burning fuse and to acquire signals from lower quantities of deposited salts ( $\approx 200 \text{ pg}$ ). Light was collected by a telescope consisting of 2 convex lenses. After the second lens, a dichroic mirror deflected visible light to a series of lenses used for imaging, so that the system could be aimed at the fuse. The remainder of the light passed through the dichroic mirror and to a set of long- and short-pass filters. These filters attenuated the light outside of the 700- to 900-nm range. The light was then split into 3 paths by 2 dichroic mirrors. The first dichroic mirror deflected light with wavelengths  $< 773 \text{ nm}$  along path A. The second dichroic mirror split the remaining light by deflecting light with wavelengths  $< 815 \text{ nm}$  along path B and allowing light with longer wavelengths to continue along path C. In each path, a series of interference filters with bandpasses of  $\approx 1 \text{ nm}$  selected for the light corresponding to atomic emission (K at 767 nm for path A, Rb at 780 nm for path B, and Cs at 852 nm for path C) and focused this light onto a detector (Si femtowatt photoreceiver, Thorlabs). The data were read with LabView by using a National Instruments USB-6009. Filters were purchased from Thorlabs and Spectrofilm.

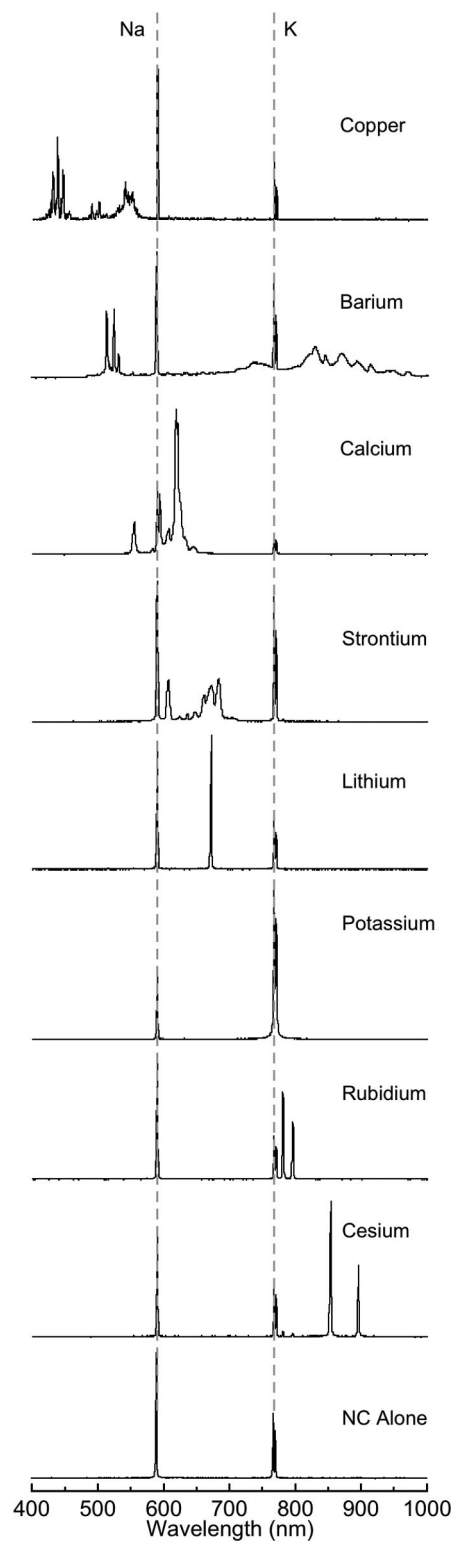

**Fig. S1.** Emission spectra of burning films of nitrocellulose with metal perchlorate salts adsorbed onto them. Dotted lines indicate background emission (sodium and potassium atoms) from the nitrocellulose.
